# Supplementary material for: Risks and Hazards of Post-Vaccine SARS-CoV-2 Infection in Antibody Naive Populations during the Mass Vaccination Campaign Against COVID-19 in Mongolia
Source: Research Square preprint supplement (doi:10.21203/rs.3.rs-6660450/v1), 2025-06-29
Supplement: Supplementary file 1 [file 5b67d9e20bfc646376ef752b.docx]

**
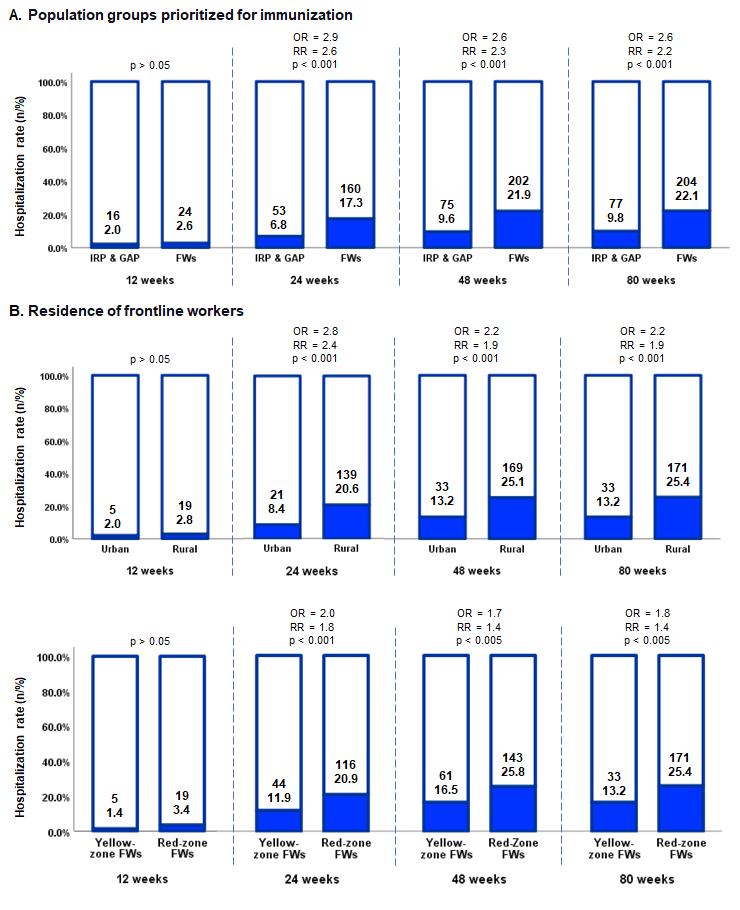
**

**Supplementary Figure 1. Risk estimates for new infections among various population groups within 80 weeks follow-up after initial vaccination.** n, number of cases; %, percent of cases; OR, odds ratio; RR, relative risk; p, statistical significance level (Fisher’s exact test) when compared population groups; IRP, increased risk population; GAP, general adult population; FWs, frontline workers; Pf, Pfizer BioNTech; SpV, Sputnik V; AZ, AstraZeneca ChadOX1; SP, Sinopharm BBIBP

**
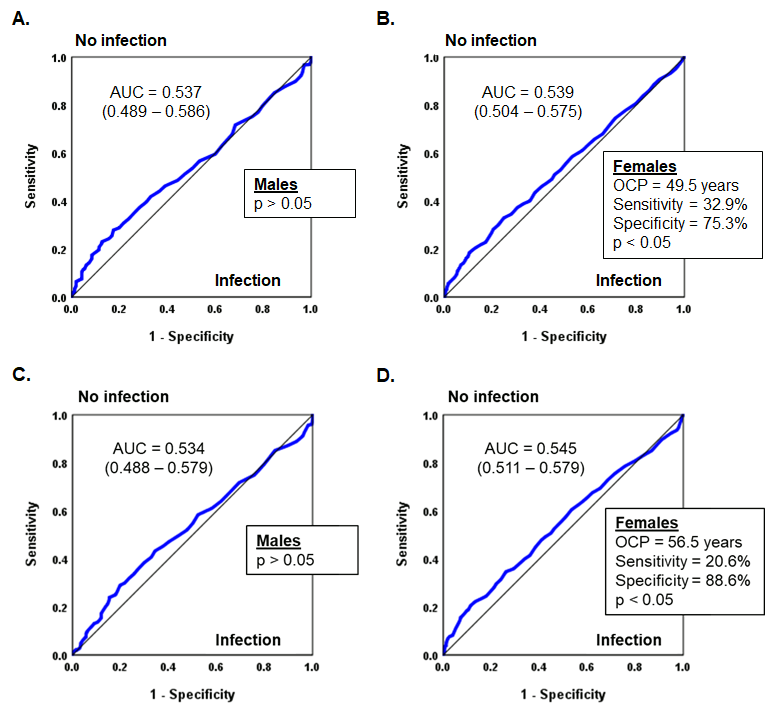
**

**Supplementary Figure 2. ROC curves of sex-adjusted age of participants stratified by the new infection state.** A. ROC curve of age in male participants stratified by new infections occurred within 24 weeks of initial vaccination; A. ROC curve of age in female participants stratified by new infections occurred within 24 weeks of initial vaccination; C. ROC curve of age in male participants stratified by new infections occurred within 80 weeks of initial vaccination; and D. ROC curve of age in female participants stratified by new infections occurred within 80 weeks of initial vaccination. AUC, Area under the curve; OCP, optimal cut-point; p, asymptotic significance


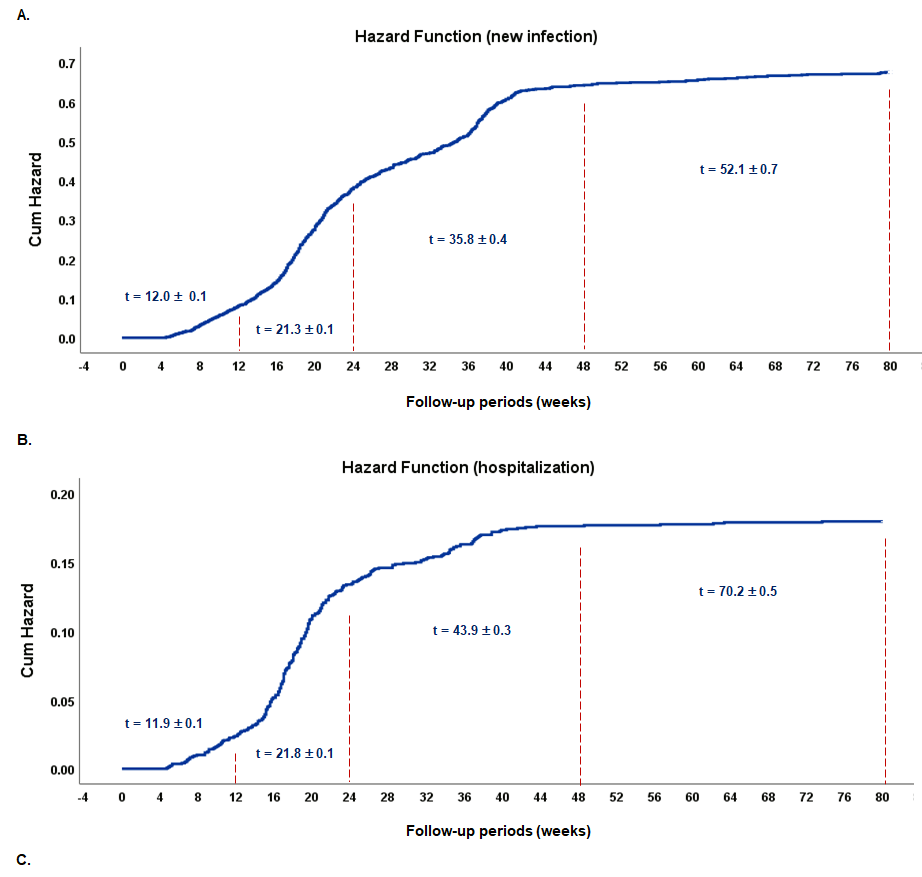


**Supplementary Figure 3. Hazard functions of COVID-19 exposures in different follow up periods after the initial vaccination.** A. Hazard function for new infection; B. Hazard function for hospitalization; t, mean infection-free time, and its standard error

**
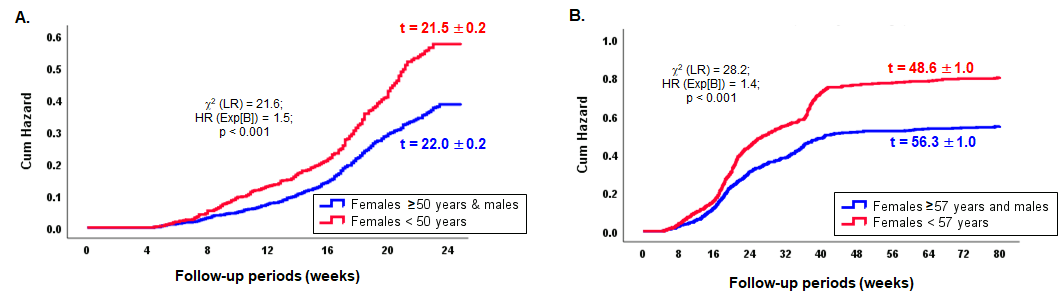
**

**Supplementary Figure 4. Hazard functions of new infection in different sex-adjusted age groups.** A. Hazard function for new infection at 24-week milestone; B. Hazard function for new infection at 24-week milestone; t, mean infection-free time, and its standard error; χ2, chi square; LR, log rank; HR, hazard ratio; exp(B), exponentiation of the B coefficient


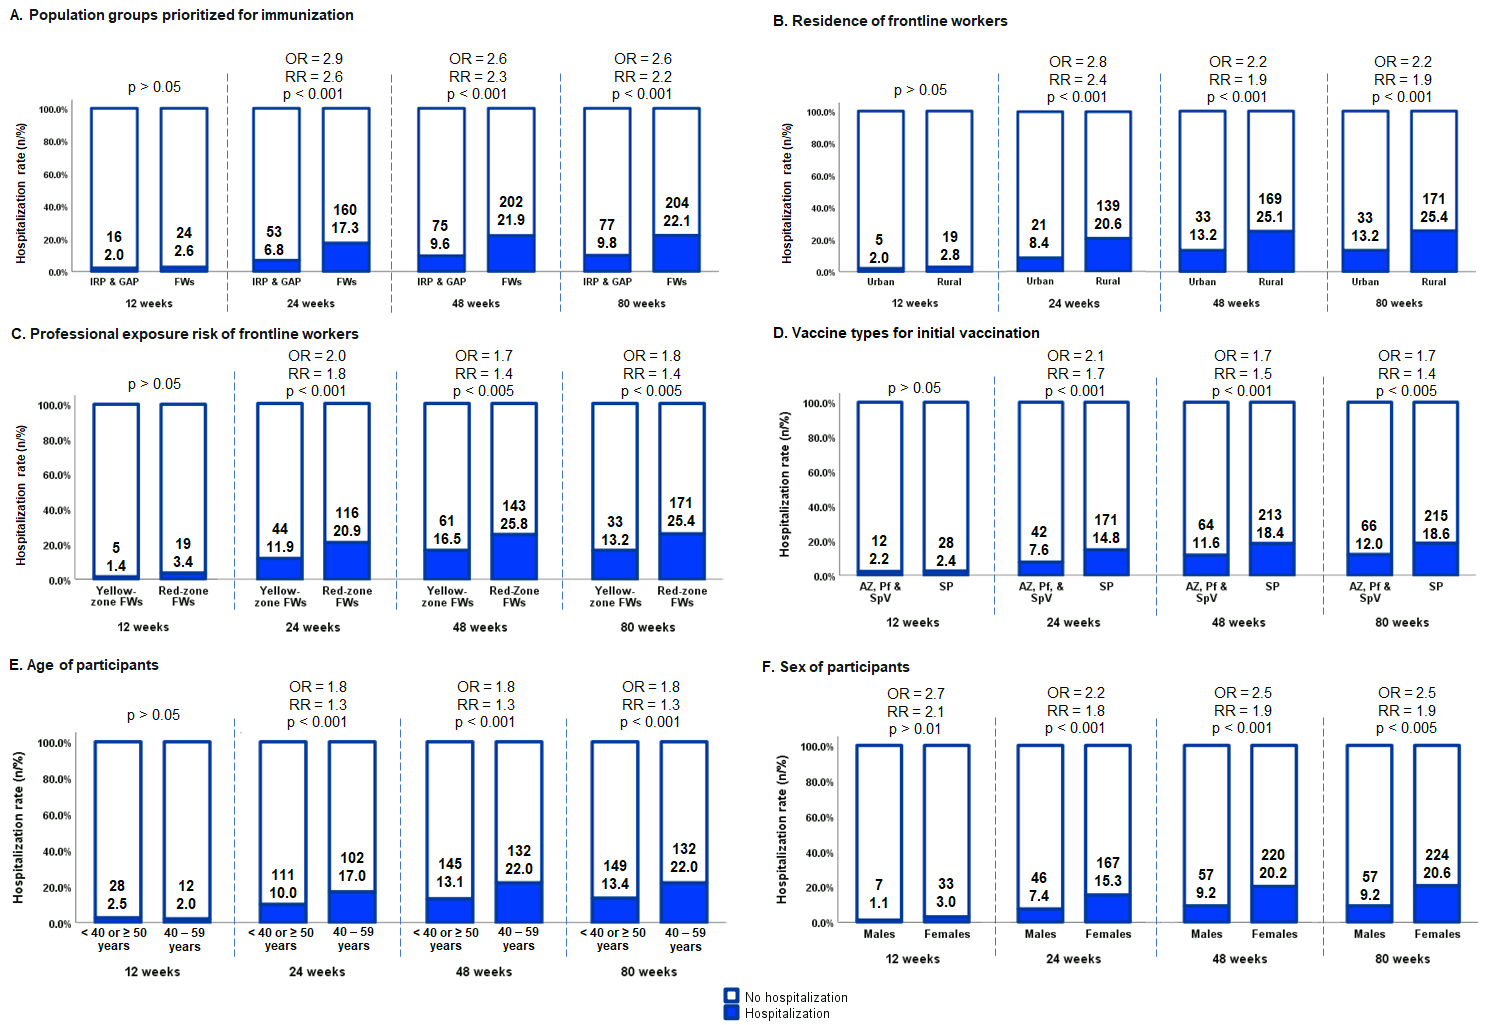


**Supplementary Figure 5. Risk estimates for hospitalization among various population groups within 80 weeks follow-up after initial vaccination.** n, number of cases; %, percent of cases; OR, odds ratio; RR, relative risk; p, statistical significance level (Fisher’s exact test) when compared population groups; IRP, increased risk population; GAP, general adult population; FWs, frontline workers; Pf, Pfizer BioNTech; SpV, Sputnik V; AZ, AstraZeneca ChadOX1; SP, Sinopharm BBIBP
