# Supplementary material for: Risks and Hazards of Post-Vaccine SARS-CoV-2 Infection in Antibody Naive Populations during the Mass Vaccination Campaign Against COVID-19 in Mongolia
Source: Research Square preprint supplement (doi:10.21203/rs.3.rs-6660450/v1), 2025-06-29
Supplement: Supplementary file 2 [file a693cc60cc5ab9b59e4b86d6.docx]

**Supplementary Table 1. The distribution of vaccine types among study populations, n (%)**

| Vaccine types | Frontline workers | Increased risk population | General adult population | Total |
| --- | --- | --- | --- | --- |
| AstraZeneca ChAdOx(S)-1 | 136 (90.1) | 0 | 15 (9.9) | 151 (100.0) |
| Pfizer BioNTech | 20 (6.0) | 305 (91.6) | 8 (2.4) | 333 (100.0) |
| Sinopharm BBIBP | 729 (63.0) | 87 (7.5) | 342 (29.5) | 1158 (100.0) |
| Sputnik V | 39 (58.2) | 21 (31.3) | 7 (10.4) | 67 (100.0) |
